# Supplementary material for: Neonatal Hemodynamic Characteristics of the Recipient Twin of Twin-To-Twin Transfusion Syndrome Not Treated with Fetoscopic Laser Surgery
Source: MDPI journal article supplement (doi:10.3390/children9111766), 2022-11-17

## Supplementary materials

**Table S1.** Comparison of the infants who died with those who survived in the cardiac failure (CF) group.

|                                                           | DEATH |               | SURVIVORS |               | p     |
|-----------------------------------------------------------|-------|---------------|-----------|---------------|-------|
|                                                           | n = 6 |               | n = 9     |               |       |
| Pregnancy                                                 |       |               |           |               |       |
| Threatened preterm labor, n                               | 1     | (0)           | 1         | (0)           | 1.00  |
| Gestational diabetes, n (%)                               | 0     | (0)           | 1         | (11)          | 1.00  |
| Pre-eclampsia, n (%)                                      | 0     | (0)           | 0         | (0)           | 1.00  |
| Premature rupture of membranes, n (%)                     | 0     | (0)           | 0         | (0)           | 1.00  |
| Antenatal corticosteroid therapy, n (%)                   | 3     | (50)          | 7         | (78)          | 0.33  |
| TTTs                                                      |       |               |           |               |       |
| Amniodrainage, n (%)                                      | 4     | (67)          | 4         | (44)          | 0.60  |
| <i>Gestational age, median [Q1 - Q3]</i>                  | 29    | [28 - 30]     | 28        | [27 -28]      | 0.46  |
| Associated-TAPS, n (%)                                    | 2     | (33)          | 2         | (22)          | 1.00  |
| Quintero stage                                            |       |               |           |               |       |
| <i>Quintero stage 1 or 2, n (%)</i>                       | 2     | (33)          | 4         | (44)          | 1.00  |
| <i>Quintero stage 3 or 4, n (%)</i>                       | 4     | (67)          | 5         | (55)          |       |
| Birth                                                     |       |               |           |               |       |
| Mode of delivery                                          |       |               |           |               |       |
| <i>Elective cesarean section, n (%)</i>                   | 1     | (16)          | 4         | (44)          | 0.58  |
| <i>Emergency cesarean section, n (%)</i>                  | 5     | (83)          | 5         | (55)          |       |
| Gestational age, median [Q1 - Q3]                         | 29    | [28 - 30]     | 29        | [29 - 31]     | 0.28  |
| Male, n (%)                                               | 3     | (50)          | 4         | (44)          | 1.00  |
| Weight (g), median [Q1 - Q3]                              | 1458  | [1024 - 1654] | 1240      | [1200 - 1445] | 1.00  |
| Weight (percentile), mediane [Q1 - Q3]                    | 75    | [43 - 83]     | 58        | [36 - 68]     | 0.22  |
| Difference of weight with the twin in %, median [Q1 - Q3] | 21.2  | [14.7 - 24.9] | 18.2      | [12.1 - 19.3] | 0.61  |
| APGAR score                                               |       |               |           |               |       |
| <i>M1, median [Q1 - Q3]</i>                               | 6     | [2 - 6]       | 4         | [2 - 6]       | 1.00  |
| <i>M5, median [Q1 - Q3]</i>                               | 7     | [4 - 8]       | 8         | [5 - 9]       | 1.00  |
| Umbilical cord pH, median [Q1 - Q3]                       | 7.30  | [7.19 - 7.30] | 7.32      | [7.29 - 7.38] | 0.51  |
| Neonatal morbidities                                      |       |               |           |               |       |
| Hemoglobin at birth (g/dl), median [Q1 - Q3]              | 19.3  | [17.6 - 23.5] | 20.0      | [14.8 - 22.1] | 0.61  |
| Hematocrit at birth (%), median [Q1 - Q3]                 | 55.8  | [50.9 - 66.7] | 59.5      | [45.8 - 62.0] | 0.61  |
| Acute kidney injury, n (%)                                | 6     | (100)         | 8         | (89)          | 1.00  |
| Fluid bolus with saline solution, n (%)                   | 4     | (67)          | 4         | (44)          | 0.61  |
| <i>Age at first fluid bolus, median [Q1 - Q3]</i>         | 17    | [15 - 18]     | 24        | [19 - 27]     | 0.34  |
| <i>Number of fluid boluses, median [Q1 - Q3]</i>          | 2     | [0 - 3]       | 0         | [0 - 1]       | 0.22  |
| Antihypertensive treatment                                |       |               |           |               |       |
| Nicardipine, n (%)                                        | 6     | (100)         | 9         | (100)         | 0.40  |
| <i>Age at onset (hours of life), median [Q1 - Q3]</i>     | 2     | [2 - 3]       | 4         | [3 - 22]      | 0.03  |
| <i>Maximal dose (μg/kg/min), median [Q1 - Q3]</i>         | 1.5   | [1.0 - 2.0]   | 0.8       | [0.7 - 1.5]   | 0.69  |
| Inotropic treatment (Milrinone, Dobutamine)               |       |               |           |               |       |
| Both milrinone and dobutamine treatments, n (%)           | 4     | (67)          | 0         | (0)           | 0.01  |
| Milrinone, n (%)                                          | 4     | (67)          | 1         | (11)          | 0.09  |
| <i>Start time (hours of life), median [Q1 - Q3]</i>       | 19    | [16 - 28]     | 39        |               |       |
| <i>Maximal dose (μg/kg/min), median [Q1 - Q3]</i>         | 0.2   | [0.2 - 0.3]   | 0.2       |               |       |
| Dobutamine, n (%)                                         | 6     | (100)         | 7         | (78)          | 0.49  |
| <i>Start time (hours of life), median [Q1 - Q3]</i>       | 6     | [5 - 11]      | 19        | [14 - 31]     | 0.06  |
| <i>Maximal dose (μg/kg/min), median [Q1 - Q3]</i>         | 20.0  | [20.0 - 20.0] | 15.0      | [10.0 - 15.0] | 0.006 |

**Figure S1.** Percentage of recipient twins with left ventricular hypertrophy depending on postnatal age (days) in the cardiac failure (CF) group and in the high systolic blood pressure (HighBP) group.

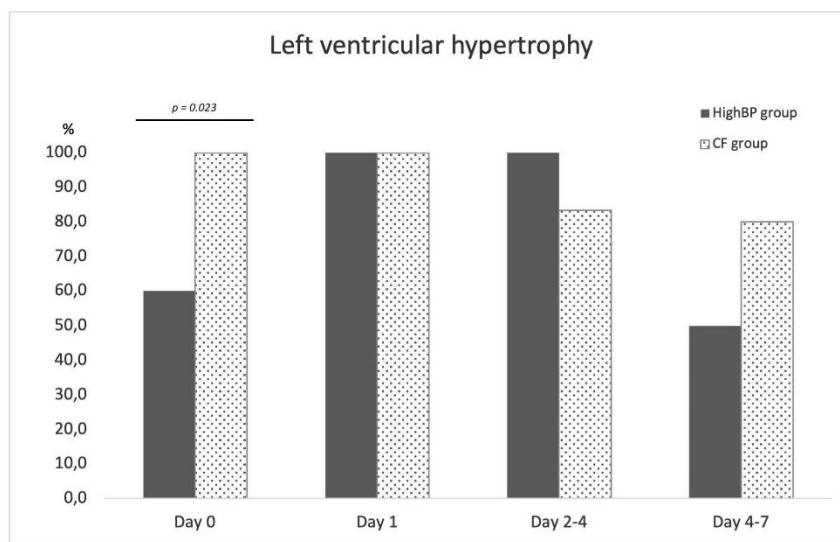

**Figure S2.** Serum concentration of blood urea nitrogen (A) and creatinine (B) during the first 5 days of life recipient twin with cardiac failure (CF group) and with high systolic blood pressure (HighBP group). Data are presented as median values and 1<sup>st</sup> and 3<sup>rd</sup> quartiles.

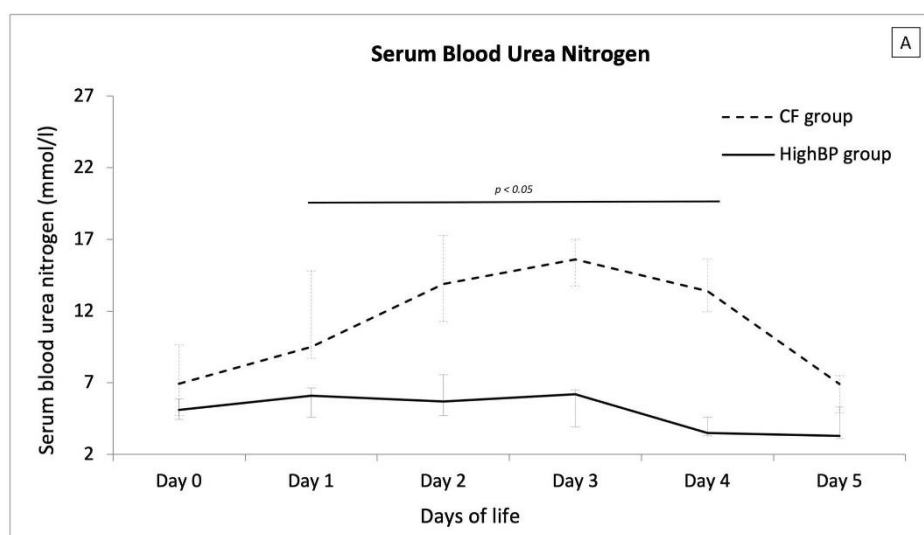

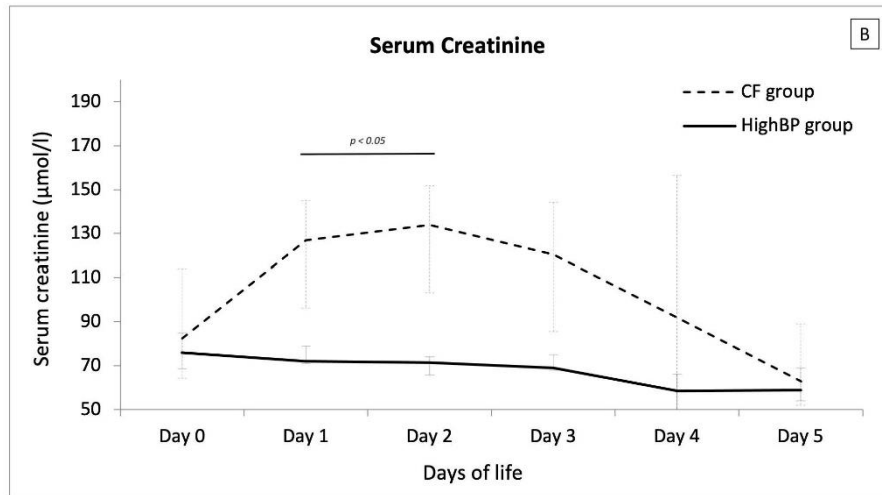

**Figure S3.** Systolic (A) and diastolic (B) blood pressure of the recipients of the cardiac failure (CF) group according to survival. All data are presented as median values and 1<sup>st</sup> and 3<sup>rd</sup> quartiles.

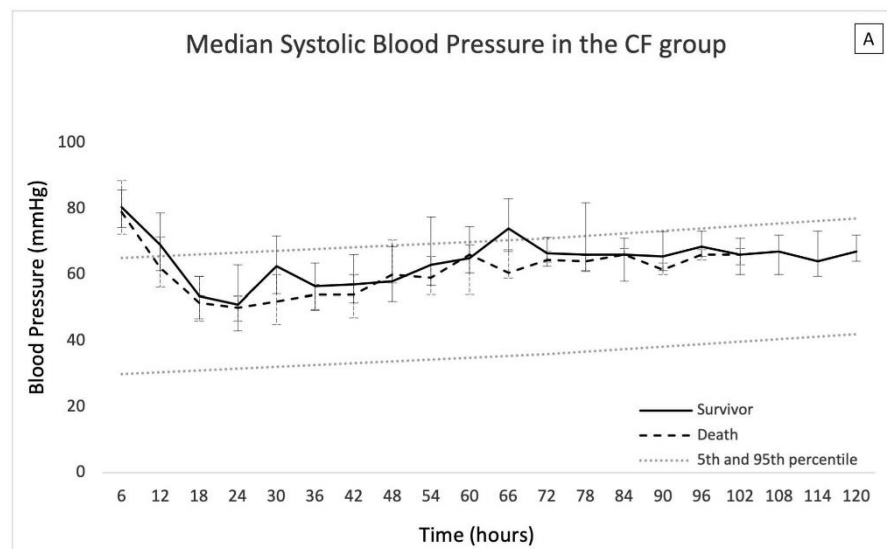

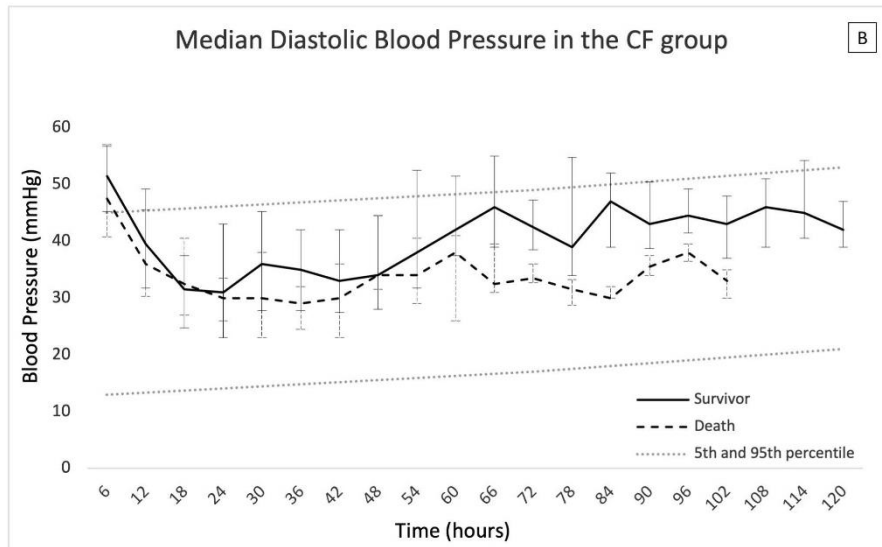

**Figure S4.** Urine output of the recipients of the cardiac failure (CF) group according to survival. All data are presented as median values and 1<sup>st</sup> and 3<sup>rd</sup> quartiles.

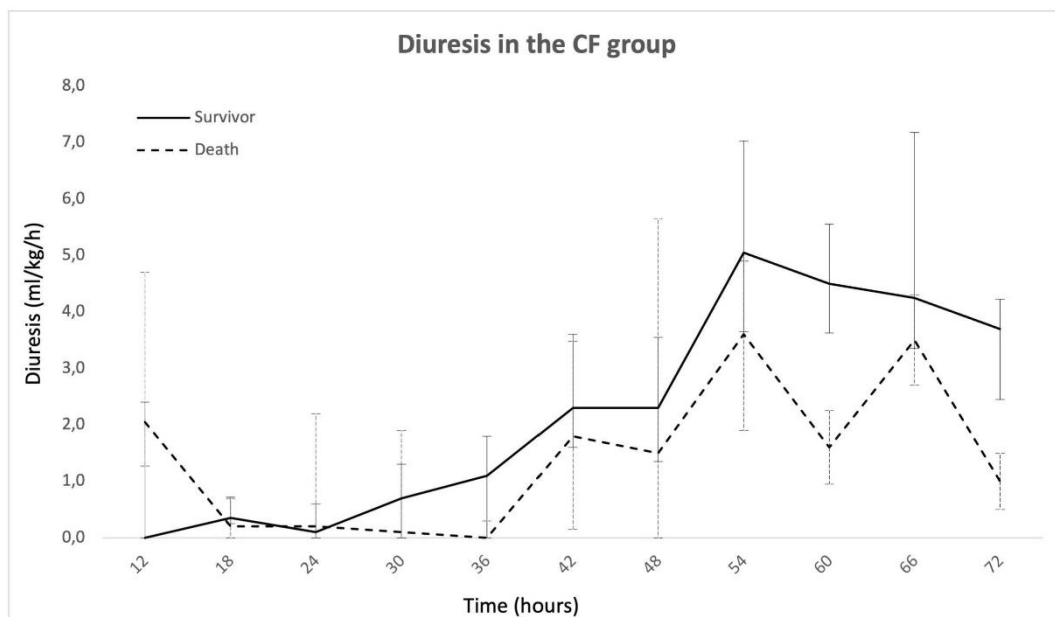

**Figure S5.** Kaplan-Meier graphic of the time without left ventricular dysfunction in recipient twins with cardiac failure who died or who survived.

Time without cardiac failure in the CF group

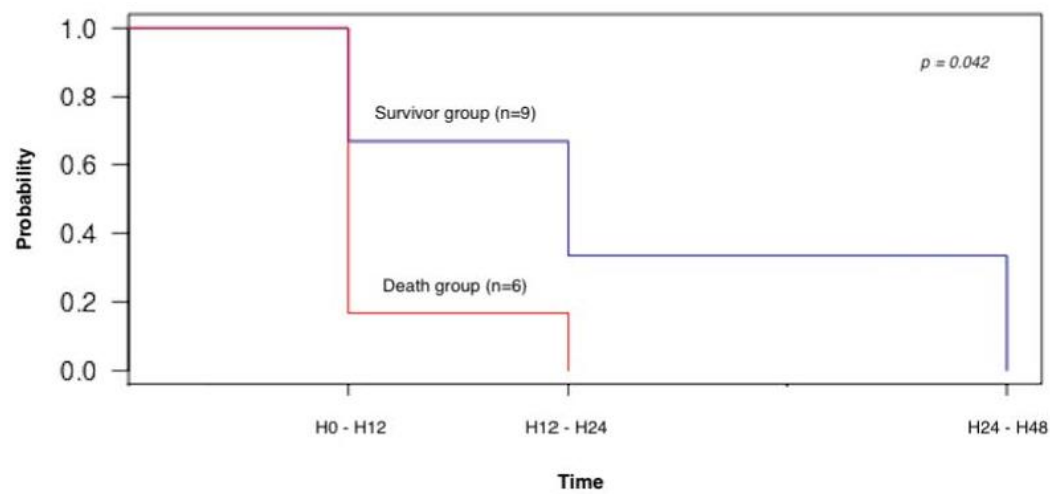

Supplement: s1 [file s1]
